# Supplementary material
Source: PubMed Central journal article supplement (PMC7899053)
Supplement: NIHMS1667557-supplement-Supplementary_Material.pdf [file NIHMS1667557-supplement-Supplementary_Material.pdf]

## Supporting Information for

### *Effects of Non-covalent Interactions on High-spin Fe(IV)–oxido Complexes*

Victoria F. Oswald,<sup>§</sup> Justin L. Lee,<sup>§</sup> Saborni Biswas,<sup>¶</sup> Andrew C. Weitz,<sup>¶</sup> Kaustuv Mittra,<sup>⊥</sup> Ruixi Fan,<sup>¶</sup> Jikun Li,<sup>¶</sup> Jiyong Zhao,<sup>†</sup> Michael Y. Hu,<sup>†</sup> Esen E. Alp,<sup>†</sup> Emile L. Bominaar,<sup>¶</sup> Yisong Guo,<sup>¶</sup> Michael T. Green,<sup>§,⊥</sup> Michael P. Hendrich,<sup>¶\*</sup> A.S. Borovik<sup>§\*</sup>

#### Table of Content

|                                                                                                                                                                                                                         |     |
|-------------------------------------------------------------------------------------------------------------------------------------------------------------------------------------------------------------------------|-----|
| Figure S1. <sup>57</sup> Fe PVDOS spectra and their simulations for all the Fe <sup>IV</sup> –oxido complexes.                                                                                                          | S2  |
| Figure S2. Negative-mode ESI mass spectra for [Fe <sup>IV</sup> poat( <sup>16/18</sup> O)] <sup>-</sup> .                                                                                                               | S2  |
| Figure S3. Normalized Fe K-edge fluorescence spectra for [Fe <sup>IV</sup> poat(O)] <sup>-</sup> and [Fe <sup>IV</sup> poat(O)---LA <sup>II</sup> ] <sup>+</sup> (LA = Mg <sup>II</sup> and Ca <sup>II</sup> ).         | S3  |
| Figure S4. Unfiltered EXAFS data and their Fourier transforms [Fe <sup>IV</sup> poat(O)] <sup>-</sup> and [Fe <sup>IV</sup> poat(O)---LA <sup>II</sup> ] <sup>+</sup> (LA = Mg <sup>II</sup> and Ca <sup>II</sup> ).    | S4  |
| Figure S5. <sup>57</sup> Fe-enriched Mössbauer spectra for [Fe <sup>IV</sup> poat(O)---LA <sup>II</sup> ] <sup>+</sup> .                                                                                                | S5  |
| Figure S6. Analysis of Fano interference of [Fe <sup>IV</sup> poat(O)] <sup>-</sup> complex.                                                                                                                            | S6  |
| Figure S7. A plot of the energy of the LMCT absorbance versus the pK <sub>a</sub> of [LA(OH <sub>2</sub> ) <sub>n</sub> ] <sup>2+</sup> .                                                                               | S6  |
| Figure S8. The effects of H-bonds and electrostatic interactions on d-orbital splitting.                                                                                                                                | S7  |
| Figure S9. The DFT optimized structures of [Fe <sup>IV</sup> poat(O)---LA <sup>II</sup> ] <sup>+</sup> (LA = Ca <sup>II</sup> , Sr <sup>II</sup> , and Ba <sup>II</sup> ).                                              | S7  |
| Figure S10. Optical spectra showing the titration of [Fe <sup>IV</sup> poat(O)] <sup>-</sup> with [15c5Sr <sup>II</sup> ](OTf) <sub>2</sub> .                                                                           | S8  |
| Table S1. Best fits of EXAFS data.                                                                                                                                                                                      | S8  |
| Table S2. Selected distances in the DFT structures.                                                                                                                                                                     | S9  |
| Table S3. DFT Coordinates for [Fe <sup>IV</sup> poat(O)] <sup>-</sup> and [Fe <sup>IV</sup> poat(O)---LA <sup>II</sup> ] <sup>+</sup> (LA = Mg <sup>II</sup> , Ca <sup>II</sup> , Sr <sup>II</sup> , Ba <sup>II</sup> ) | S9  |
| Reference                                                                                                                                                                                                               | S21 |

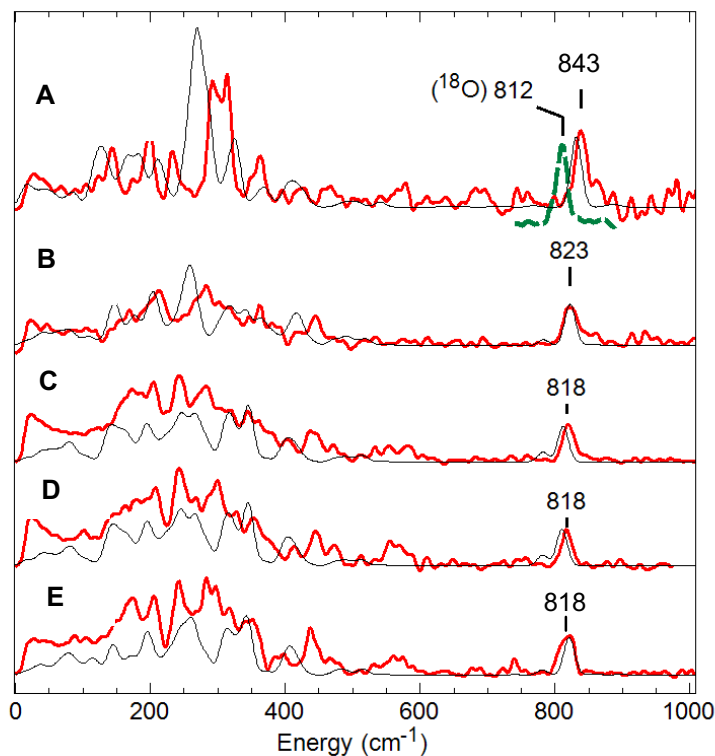

Figure S1.  $^{57}\text{Fe}$  PVDOS spectra (red trace – experimental; grey trace – simulated) for  $[\text{Fe}^{\text{IV}}\text{poat}(\text{O})]^-$  (A),  $[\text{Fe}^{\text{IV}}\text{poat}(\text{O})\text{---Mg}^{\text{II}}]^+$  (B),  $[\text{Fe}^{\text{IV}}\text{poat}(\text{O})\text{---Ca}]^+$  (C),  $[\text{Fe}^{\text{IV}}\text{poat}(\text{O})\text{---Sr}]^+$  (D), and  $[\text{Fe}^{\text{IV}}\text{poat}(\text{O})\text{---Ba}]^+$  (E). The green spectrum is of  $[\text{Fe}^{\text{IV}}\text{poat}^{(18)\text{O}}]^-$ . Samples were  $\sim 20\text{mM}$   $^{57}\text{Fe}$  in a DMF:THF mixture.

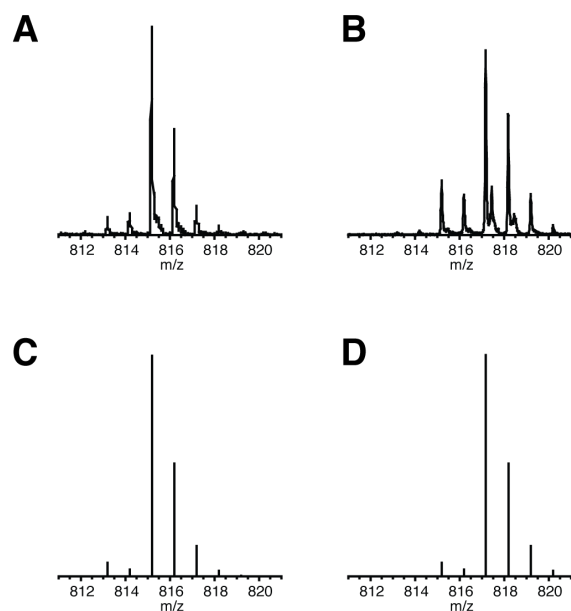

Figure S2. Negative-mode ESI mass spectra for  $[\text{Fe}^{\text{IV}}\text{poat}^{(16)\text{O}}]^-$  (A) and  $[\text{Fe}^{\text{IV}}\text{poat}^{(18)\text{O}}]^-$  (B) and their calculated spectra (C) and (D), respectively. The samples were prepared from  $[\text{Fe}^{\text{II}}\text{poat}]^-$  and  $^{(16)\text{O}}\text{IBX-iPr}$  and  $^{(18)\text{O}}\text{IBX-iPr}$ , respectively, in EtCN at  $-90^\circ\text{C}$ .

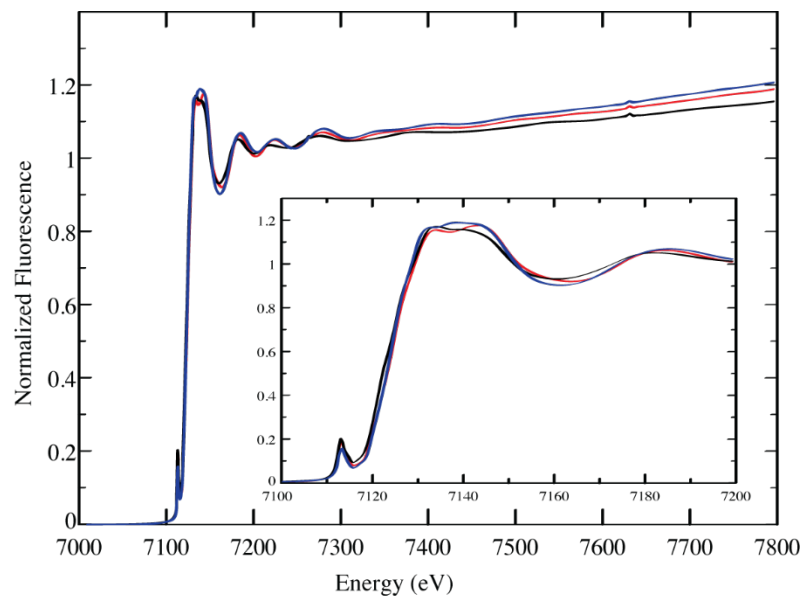

Figure S3. Normalized Fe K-edge fluorescence spectra of  $[\text{Fe}^{\text{IV}}\text{poat}(\text{O})]^-$  (black),  $[\text{Fe}^{\text{IV}}\text{poat}(\text{O})\text{---Mg}^{\text{II}}]^+$  (blue), and  $[\text{Fe}^{\text{IV}}\text{poat}(\text{O})\text{---Ca}]^+$  (red). Inset is the zoom on the XANES region.

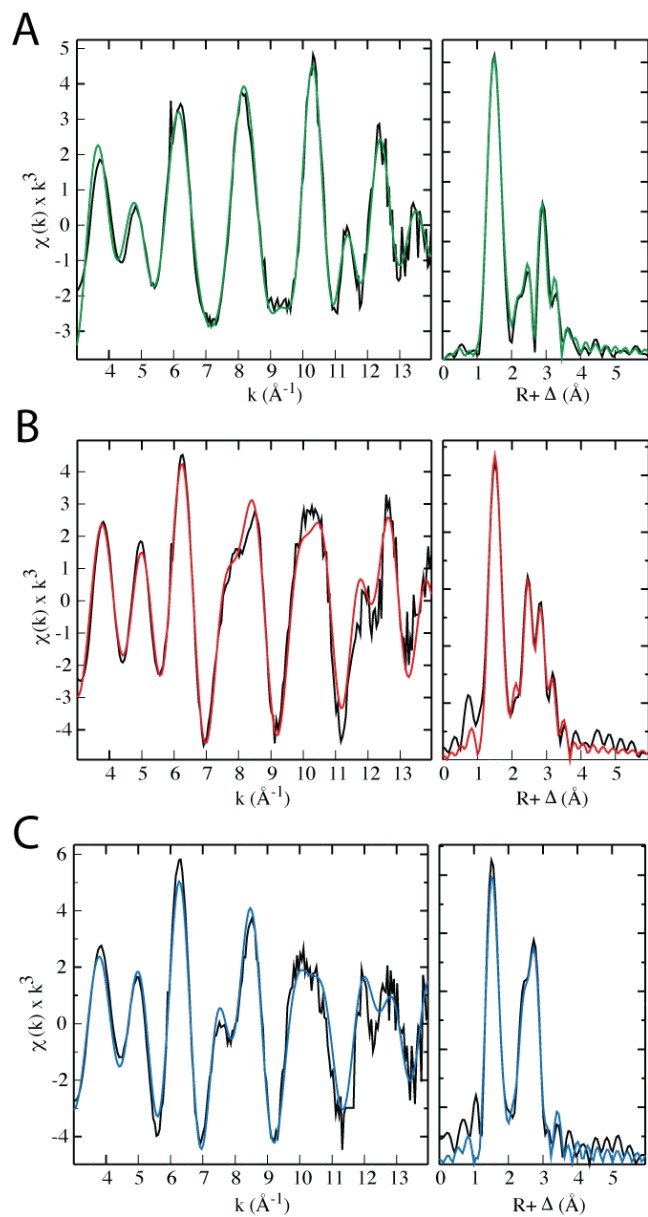

Figure S4. Unfiltered EXAFS data (left) and the Fourier transforms (right) for  $[\text{Fe}^{\text{IV}}\text{poat}(\text{O})]^-$  (**A**),  $[\text{Fe}^{\text{IV}}\text{poat}(\text{O})\text{---Ca}^{\text{II}}]^+$  (**B**), and  $[\text{Fe}^{\text{IV}}\text{poat}(\text{O})\text{---Mg}]^+$  (**C**). The black traces are experimental data and the colored traces are the corresponding simulated fits.

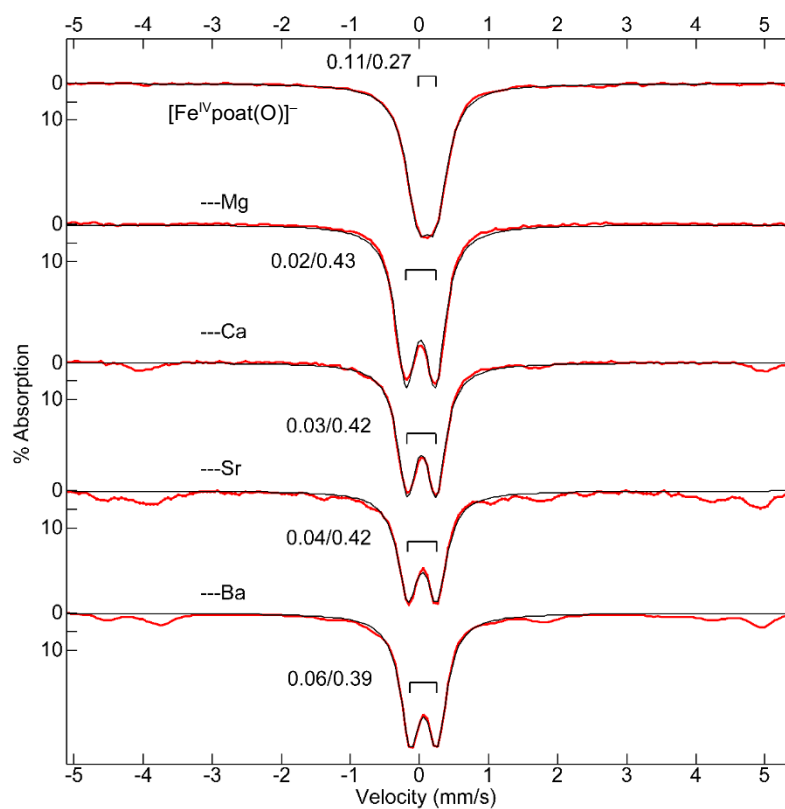

Figure S5.  $^{57}\text{Fe}$ -enriched Mössbauer spectra of  $[\text{Fe}^{\text{IV}}\text{poat}(\text{O})]^-$  and with LA adducts as listed (red traces, 4.2 K, no applied magnetic field) generated at  $-80^\circ\text{C}$ . The black traces are fits for  $\delta/\Delta E_q$  in mm/s as listed.

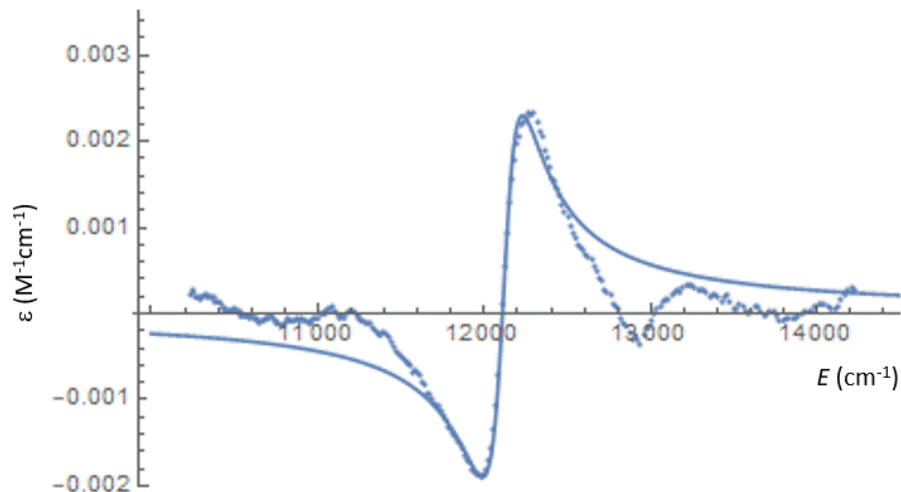

Figure S6. Fano interference observed for  $[\text{Fe}^{\text{IV}}\text{poat}(\text{O})]^-$  (see Figure 7A) from which the background was subtracted (dots). The solid curve is a simulation using eq S1,<sup>1</sup> from which the background was removed.

$$F(E) = f \left[ \frac{\left( q + \frac{E-E_0}{w} \right)^2}{\left( 1 + \left( \frac{E-E_0}{w} \right)^2 \right) - 1} \right]. \quad \text{S1}$$

In eq S1,  $E$  is the energy of the incident radiation,  $E_0$  and  $w$  are respectively energy at maximum and width parameter of the sharp  ${}^5\text{A} \rightarrow {}^3\text{E}$  band,  $f$  is the background absorption, and  $q$  is a parameter which depends on the extent of the spin-orbit coupling between  ${}^5\text{E}$  and  ${}^3\text{E}$ . Parameters used in simulation:  $E_0 = 12120 \text{ cm}^{-1}$ ,  $w = 120 \text{ cm}^{-1}$ ,  $f = 0.0019$ , and  $q = 1.1$ .

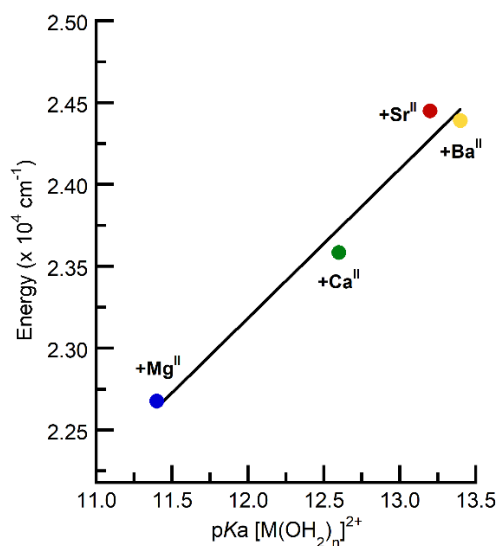

Figure S7. A plot of the energy of the LMCT absorbances versus the  $\text{p}K_a$  of  $[\text{LA}(\text{OH}_2)_n]^{2+}$ .

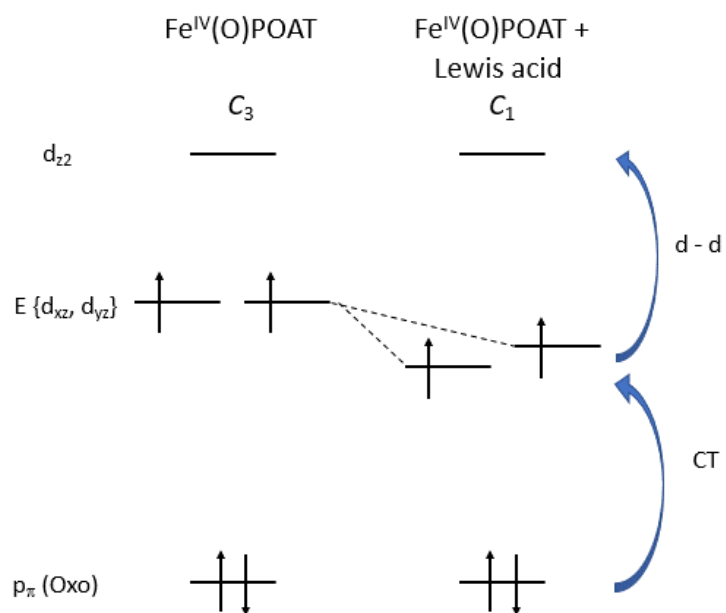

Figure S8. Schematic representation of the effects of H-bonds and electrostatic interactions on d-orbital energies.

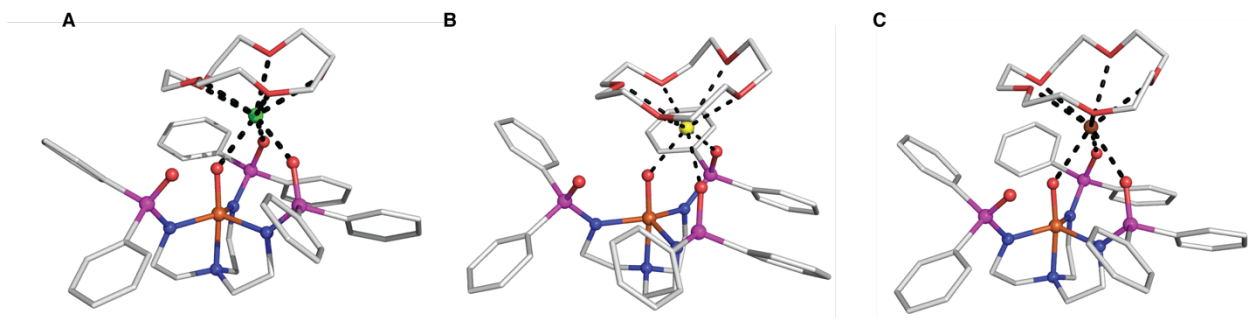

Figure S9. DFT-optimized structures for  $[\text{Fe}^{\text{IV}}\text{poat}(\text{O})\cdots\text{Ca}^{\text{II}}]^+$  (**A**),  $[\text{Fe}^{\text{IV}}\text{poat}(\text{O})\cdots\text{Sr}^{\text{II}}]^+$  (**B**), and  $[\text{Fe}^{\text{IV}}\text{poat}(\text{O})\cdots\text{Ba}^{\text{II}}]^+$  (**C**). Key:  $\text{Ca}^{\text{II}}$  ion is the green sphere,  $\text{Sr}^{\text{II}}$  ion is the yellow sphere, and  $\text{Ba}^{\text{II}}$  ion is the brown sphere. The remaining colors of the atoms are the same as those listed in the legend of Figure 10 and hydrogen atoms are omitted for clarity.

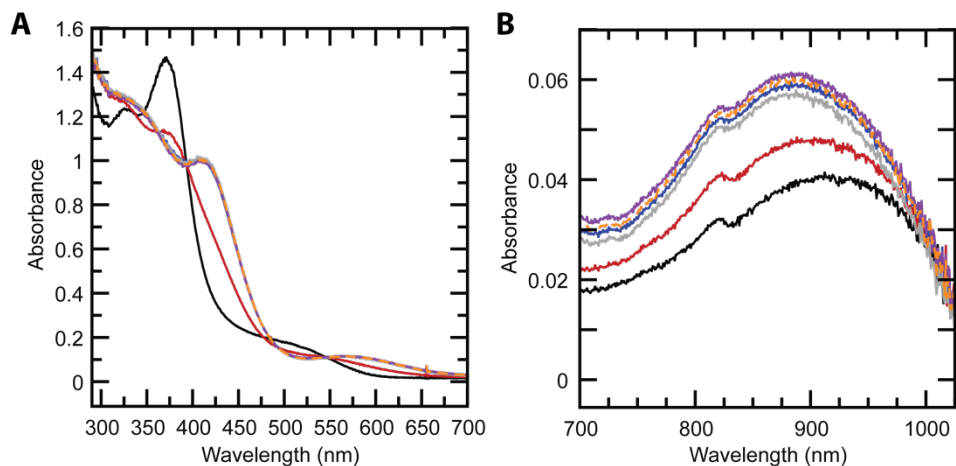

Figure S10. Optical spectra showing the titration of  $[\text{Fe}^{\text{IV}}\text{poat}(\text{O})]^-$  with  $[\text{15c5Sr}^{\text{II}}](\text{OTf})_2$  in THF:DMF at  $-60^\circ\text{C}$ . Higher energy region (A) and lower energy region (B). Key:  $[\text{Fe}^{\text{IV}}\text{poat}(\text{O})]^-$  (black solid-line),  $[\text{Fe}^{\text{IV}}\text{poat}(\text{O})]^- + 0.5$  equiv of  $[\text{15c5Sr}^{\text{II}}](\text{OTf})_2$  (red solid-line);  $[\text{Fe}^{\text{IV}}\text{poat}(\text{O})]^- + 1.0$  equiv of  $[\text{15c5Sr}^{\text{II}}](\text{OTf})_2$  (blue solid-line);  $[\text{Fe}^{\text{IV}}\text{poat}(\text{O})]^- + 2.0$  equiv of  $[\text{15c5Sr}^{\text{II}}](\text{OTf})_2$  (gray solid-line);  $[\text{Fe}^{\text{IV}}\text{poat}(\text{O})]^- + 3.0$  equiv of  $[\text{15c5Sr}^{\text{II}}](\text{OTf})_2$  (purple solid-line);  $[\text{Fe}^{\text{IV}}\text{poat}(\text{O})]^- + 4.0$  equiv of  $[\text{15c5Sr}^{\text{II}}](\text{OTf})_2$  (orange dashed line) Initial  $[[\text{Fe}^{\text{IV}}\text{poat}(\text{O})]^-] = 0.20$  mM.

Table S1. Best fits of EXAFS data collected for the  $\text{Fe}^{\text{IV}}$ -oxido complexes

|                   |                      | Complex                                          |                                                                             |                                                                             |
|-------------------|----------------------|--------------------------------------------------|-----------------------------------------------------------------------------|-----------------------------------------------------------------------------|
|                   |                      | $[\text{Fe}^{\text{IV}}\text{poat}(\text{O})]^-$ | $[\text{Fe}^{\text{IV}}\text{poat}(\text{O})\cdots\text{Ca}^{\text{II}}]^+$ | $[\text{Fe}^{\text{IV}}\text{poat}(\text{O})\cdots\text{Mg}^{\text{II}}]^+$ |
| Fe-O              | N                    | 1                                                | 1                                                                           | 1                                                                           |
|                   | R(Å)                 | 1.65                                             | 1.67                                                                        | 1.67                                                                        |
|                   | $\sigma^2 (10^{-3})$ | 2.34                                             | 1.36                                                                        | 3.18                                                                        |
| Fe-N              | N                    | 4                                                | 4                                                                           | 4                                                                           |
|                   | R(Å)                 | 1.99                                             | 2.00                                                                        | 1.98                                                                        |
|                   | $\sigma^2 (10^{-3})$ | 5.70                                             | 6.62                                                                        | 5.53                                                                        |
| Fe-C              | N                    | 3                                                | 4                                                                           | 3                                                                           |
|                   | R(Å)                 | 2.85                                             | 2.95                                                                        | 2.94                                                                        |
|                   | $\sigma^2 (10^{-3})$ | 5.75                                             | 2.41                                                                        | 1.63                                                                        |
| Fe-P              | N                    | 3                                                | 3                                                                           | 3                                                                           |
|                   | R(Å)                 | 3.30                                             | 3.23                                                                        | 3.19                                                                        |
|                   | $\sigma^2 (10^{-3})$ | 5.38                                             | 3.36                                                                        | 2.48                                                                        |
| Fe-O <sub>p</sub> | N                    | 2                                                | 3                                                                           | 3                                                                           |
|                   | R(Å)                 | 3.72                                             | 3.59                                                                        | 3.46                                                                        |
|                   | $\sigma^2 (10^{-3})$ | 3.32                                             | 4.05                                                                        | 4.71                                                                        |
| GOF               | $E_0$                | -15.19                                           | 1.73                                                                        | -4.63                                                                       |
|                   | F                    | 33                                               | 66                                                                          | 89                                                                          |
|                   | $F^2$                | 205                                              | 257                                                                         | 286                                                                         |



Table S2. Selected distances from DFT for [Fe<sup>IV</sup>poat(O)]<sup>-</sup> and its LA bound derivatives<sup>a</sup>

| Complex                                                     | Bond distances (Å)  |                                      |                       |                              |
|-------------------------------------------------------------|---------------------|--------------------------------------|-----------------------|------------------------------|
|                                                             | Fe <sup>IV</sup> -O | Fe <sup>IV</sup> O---M <sup>II</sup> | M <sup>II</sup> -O(P) | M <sup>II</sup> -O(15c5)     |
| [Fe <sup>IV</sup> poat(O)] <sup>-</sup>                     | 1.639               | –                                    | –                     | –                            |
| [Fe <sup>IV</sup> poat(O)---Mg <sup>2+</sup> ] <sup>+</sup> | 1.665               | 2.05                                 | 2.02, 2.02            | 2.14, 2.18, 2.19, 4.63, 4.30 |
| [Fe <sup>IV</sup> poat(O)---Ca <sup>2+</sup> ] <sup>+</sup> | 1.662               | 2.33                                 | 2.32, 2.33            | 2.55, 2.62, 2.63, 2.63, 2.70 |
| [Fe <sup>IV</sup> poat(O)---Sr <sup>2+</sup> ] <sup>+</sup> | 1.659               | 2.45                                 | 2.45, 2.50            | 2.67, 2.68, 2.73, 2.75, 2.80 |
| [Fe <sup>IV</sup> poat(O)---Ba <sup>2+</sup> ] <sup>+</sup> | 1.657               | 2.57                                 | 2.65, 2.59            | 2.81, 2.84, 2.88, 2.91, 2.97 |

<sup>a</sup>M<sup>II</sup> is LA bound species.Table S3A. Coordinates (x,y,z) for DFT optimized structure of [Fe<sup>IV</sup>poat(O)]<sup>-</sup>.

|    | X           | Y           | Z           |
|----|-------------|-------------|-------------|
| C  | 1.37687687  | -0.39927127 | -3.28214620 |
| C  | 2.38957785  | 0.12491842  | -2.27701413 |
| C  | -1.03207515 | -0.99443656 | -3.28204020 |
| C  | -1.08509016 | -2.13292595 | -2.27614813 |
| C  | -0.34286968 | 1.38934053  | -3.28317220 |
| C  | -1.30301063 | 2.00531322  | -2.27850213 |
| Fe | 0.00010203  | -0.00008210 | -0.64563201 |
| N  | 0.00055401  | -0.00128710 | -2.84981417 |
| N  | 1.97161070  | -0.33989510 | -0.92773703 |
| N  | -1.27990132 | -1.53744934 | -0.92759003 |
| N  | -0.69137029 | 1.87658315  | -0.92925003 |
| O  | -0.00028595 | 0.00116091  | 0.99401611  |
| P  | 3.21561597  | -0.55374751 | 0.15707005  |
| P  | -2.08747815 | -2.50628976 | 0.15834305  |
| P  | -1.12746171 | 3.06081398  | 0.15584205  |
| H  | 1.57159470  | -0.03383481 | -4.29878627 |
| H  | 1.42686754  | -1.48656200 | -3.29149320 |
| H  | 2.44354227  | 1.21907979  | -2.32190013 |
| H  | 3.38171903  | -0.24645868 | -2.55293115 |
| H  | -1.99864463 | -0.49395979 | -3.29215920 |
| H  | -0.81244577 | -1.34645948 | -4.29833727 |
| H  | -1.90237510 | -2.80688523 | -2.55220115 |
| H  | -0.16426791 | -2.72647112 | -2.31973313 |
| H  | 0.57388311  | 1.97608649  | -3.29296220 |
| H  | -0.75676691 | 1.37452198  | -4.29977627 |
| H  | -1.47709688 | 3.05007859  | -2.55516715 |
| H  | -2.27773830 | 1.50523603  | -2.32303013 |
| O  | 3.99311205  | 0.66259533  | 0.63431708  |
| O  | -2.56903197 | 3.12565399  | 0.63472008  |
| O  | -1.42242396 | -3.78604962 | 0.63959808  |
| C  | -2.66867669 | -1.48156903 | 1.54423415  |
| C  | -3.04359900 | -0.13736299 | 1.41445314  |

|   |             |             |             |
|---|-------------|-------------|-------------|
| C | -2.80445201 | -2.11214129 | 2.79237323  |
| C | -3.54939375 | 0.56709872  | 2.50814822  |
| H | -2.90698107 | 0.38793924  | 0.48289507  |
| C | -3.31836479 | -1.41030847 | 3.88448131  |
| H | -2.49009354 | -3.14112951 | 2.89721224  |
| C | -3.69421817 | -0.07087442 | 3.74295330  |
| H | -3.78281597 | 1.61427487  | 2.37918521  |
| H | -3.41062530 | -1.90331929 | 4.84469039  |
| H | -4.07992498 | 0.47689471  | 4.59443836  |
| C | -3.65190477 | -3.00032219 | -0.70544102 |
| C | -3.98662174 | -4.36185587 | -0.76730002 |
| C | -4.52260848 | -2.06303064 | -1.28700506 |
| C | -5.16280032 | -4.77874840 | -1.39921006 |
| H | -3.31209409 | -5.07481381 | -0.31346399 |
| C | -5.69918404 | -2.47778817 | -1.91544210 |
| H | -4.28262658 | -1.00939673 | -1.23899705 |
| C | -6.02142600 | -3.83820302 | -1.97433211 |
| H | -5.40837421 | -5.83302726 | -1.43929807 |
| H | -6.36371742 | -1.74325336 | -2.35344813 |
| H | -6.93448531 | -4.15941001 | -2.46048514 |
| C | 0.04811924  | 3.05065749  | 1.54378815  |
| C | 1.40038078  | 2.70513664  | 1.41566514  |
| C | -0.43289014 | 3.48008086  | 2.79199824  |
| C | 2.26127696  | 2.78961531  | 2.51108021  |
| H | 1.78925982  | 2.32669949  | 0.48399407  |
| C | 0.42984515  | 3.57308750  | 3.88581232  |
| H | -1.48175305 | 3.72050570  | 2.89543825  |
| C | 1.77843174  | 3.23089670  | 3.74594430  |
| H | 3.28538881  | 2.46940079  | 2.38327521  |
| H | 0.04689939  | 3.89697757  | 4.84602938  |
| H | 2.44407656  | 3.29011094  | 4.59873737  |
| C | -0.77064659 | 4.66236240  | -0.70756402 |
| C | -1.78184686 | 5.63347981  | -0.77128702 |
| C | 0.47754126  | 4.94712097  | -1.28704206 |
| C | -1.55316667 | 6.86032085  | -1.40300506 |
| H | -2.73744392 | 5.40625136  | -0.31911099 |
| C | 0.70827244  | 6.17324801  | -1.91527510 |
| H | 1.26964763  | 4.21218548  | -1.23749505 |
| C | -0.30822299 | 7.13296847  | -1.97606611 |
| H | -2.34300698 | 7.60048535  | -1.44455907 |
| H | 1.67750024  | 6.38096426  | -2.35167414 |
| H | -0.12861644 | 8.08412018  | -2.46212414 |
| C | 2.61993459  | -1.56542173 | 1.54636914  |
| C | 1.64280238  | -2.56232093 | 1.42048414  |
| C | 3.23506729  | -1.36412882 | 2.79336624  |
| C | 1.28620599  | -3.34897128 | 2.51697422  |
| H | 1.11870940  | -2.70975503 | 0.48987807  |
| C | 2.88497782  | -2.15672227 | 3.88818732  |
| H | 3.96947471  | -0.57741445 | 2.89512224  |
| C | 1.91232763  | -3.15189952 | 3.75060231  |
| H | 0.49559237  | -4.07471192 | 2.39083920  |
| H | 3.35910008  | -1.98745251 | 4.84742039  |
| H | 1.63133964  | -3.75710286 | 4.60419737  |
| C | 4.42340942  | -1.66460151 | -0.70617602 |

|   |            |             |             |
|---|------------|-------------|-------------|
| C | 5.76976264 | -1.27407422 | -0.77305702 |
| C | 4.04531925 | -2.88909661 | -1.28281806 |
| C | 6.71704500 | -2.08635476 | -1.40502907 |
| H | 6.05131610 | -0.33202786 | -0.32301799 |
| C | 4.99095759 | -3.70279913 | -1.91127010 |
| H | 3.01298597 | -3.20785903 | -1.23091206 |
| C | 6.33011096 | -3.30203075 | -1.97515111 |
| H | 7.75278622 | -1.77214239 | -1.44898307 |
| H | 4.68575913 | -4.64692318 | -2.34540913 |
| H | 7.06339870 | -3.93382146 | -2.46129014 |

Table S3B. Coordinates (x,y,z) for DFT optimized structure of  $[\text{Fe}^{\text{IV}}\text{poat}(\text{O})\text{---Mg}^{\text{II}}]^+$

|   | X           | Y           | Z           |
|---|-------------|-------------|-------------|
| C | 2.34352826  | 0.00827297  | -3.70735198 |
| C | 3.34214637  | -0.42564874 | -2.63811451 |
| C | 3.18913144  | -2.87138751 | 0.02198368  |
| C | 2.38774376  | -3.51533997 | -0.93249753 |
| C | 2.20969931  | -4.90237622 | -0.89413529 |
| C | 2.83318584  | -5.66043044 | 0.09987299  |
| C | 3.63165619  | -5.02825394 | 1.06040128  |
| C | 3.80802532  | -3.64413091 | 1.02302815  |
| C | 5.20927069  | -0.79829328 | -0.26633133 |
| C | 6.02363976  | -1.71549089 | -0.95090715 |
| C | 7.38145117  | -1.44847139 | -1.14706560 |
| C | 7.93939084  | -0.26242643 | -0.66295063 |
| C | 7.13834259  | 0.65385322  | 0.02561538  |
| C | 5.78262016  | 0.38760875  | 0.22710249  |
| C | 0.21393225  | 1.29116946  | -3.96307307 |
| C | -0.75857393 | 0.13712024  | -3.73315870 |
| C | -2.33285406 | -2.53432875 | -1.78883208 |
| C | -1.54768064 | -3.21617562 | -2.73380238 |
| C | -1.71013753 | -4.58969433 | -2.93082509 |
| C | -2.65033102 | -5.29678798 | -2.17536857 |
| C | -3.41921206 | -4.63077565 | -1.21669894 |
| C | -3.26766063 | -3.25657033 | -1.02461992 |
| C | -3.62571984 | 0.00565730  | -2.37542177 |
| C | -4.35114746 | -0.65430759 | -3.38061547 |
| C | -5.44229336 | -0.02853475 | -3.99098864 |
| C | -5.82058619 | 1.25818407  | -3.60171554 |
| C | -5.10690569 | 1.92127834  | -2.59759549 |
| C | -4.01567306 | 1.30117720  | -1.98735868 |
| C | 2.20594529  | 2.35172290  | -2.87716689 |
| C | 1.40136925  | 3.24332983  | -1.93190190 |
| C | 1.44170036  | 3.74409981  | 1.39316902  |
| C | 2.20596431  | 2.82703381  | 2.14364387  |
| C | 3.32893876  | 3.26297680  | 2.84799798  |
| C | 3.71101363  | 4.60831372  | 2.80966183  |
| C | 2.97346601  | 5.51860887  | 2.05023853  |
| C | 1.84757095  | 5.08963909  | 1.34018600  |
| C | -1.04983704 | 4.44298105  | -0.02740148 |
| C | -1.69559747 | 4.44898637  | -1.27539406 |
| C | -2.63911897 | 5.43155773  | -1.58565858 |

|    |             |             |             |
|----|-------------|-------------|-------------|
| C  | -2.95743922 | 6.41733234  | -0.64836021 |
| C  | -2.33854090 | 6.40962456  | 0.60512375  |
| C  | -1.39525997 | 5.42827387  | 0.91578127  |
| Fe | 0.85971980  | 0.38650528  | -1.28904569 |
| N  | 1.45479227  | 1.07770249  | -3.14337997 |
| N  | 2.63281161  | -0.44468288 | -1.33006131 |
| N  | -0.80493104 | -0.15816586 | -2.27674356 |
| N  | 0.69488280  | 2.37939741  | -0.94961573 |
| O  | 0.42076985  | -0.24538453 | 0.18749265  |
| P  | 3.41940297  | -1.05485964 | 0.02845926  |
| P  | -2.17702450 | -0.73735334 | -1.55102002 |
| P  | 0.06376879  | 3.06423223  | 0.41209778  |
| H  | 2.84310586  | 0.36806161  | -4.61250339 |
| H  | 1.70482379  | -0.82943381 | -3.97965129 |
| H  | 4.20576027  | 0.24459566  | -2.61280830 |
| H  | 3.73162884  | -1.41155682 | -2.91113761 |
| H  | 1.89006369  | -2.92436627 | -1.68824482 |
| H  | 1.58604321  | -5.38564726 | -1.63421033 |
| H  | 2.70281104  | -6.73400053 | 0.12582714  |
| H  | 4.11794985  | -5.61276913 | 1.82993956  |
| H  | 4.42758322  | -3.16171838 | 1.76723114  |
| H  | 5.60737724  | -2.64492028 | -1.31602913 |
| H  | 8.00081858  | -2.16583324 | -1.66853000 |
| H  | 8.99095218  | -0.05808556 | -0.81263482 |
| H  | 7.57057128  | 1.56675890  | 0.41306379  |
| H  | 5.16725027  | 1.08189274  | 0.78282103  |
| H  | -0.24013986 | 2.21664783  | -3.62214411 |
| H  | 0.47641779  | 1.39844298  | -5.02058276 |
| H  | -1.73801658 | 0.42671132  | -4.12332928 |
| H  | -0.44564596 | -0.74122629 | -4.30898704 |
| H  | -0.80488687 | -2.67774427 | -3.30465014 |
| H  | -1.10741075 | -5.10419299 | -3.66741804 |
| H  | -2.77582730 | -6.36049934 | -2.32626993 |
| H  | -4.12220539 | -5.17784745 | -0.60561365 |
| H  | -3.84412053 | -2.76084432 | -0.25669562 |
| H  | -4.07842860 | -1.65776877 | -3.67680071 |
| H  | -5.99698743 | -0.54765325 | -4.76061487 |
| H  | -6.66808880 | 1.73848635  | -4.07157042 |
| H  | -5.40270820 | 2.91426024  | -2.28666532 |
| H  | -3.47357880 | 1.81176919  | -1.20299297 |
| H  | 3.14291267  | 2.07495384  | -2.40337752 |
| H  | 2.42843251  | 2.85931966  | -3.82117370 |
| H  | 2.09768730  | 3.93697130  | -1.44706781 |
| H  | 0.69622621  | 3.86251262  | -2.49555695 |
| H  | 1.94843064  | 1.77717587  | 2.15417812  |
| H  | 3.90787929  | 2.54808698  | 3.41674322  |
| H  | 4.58079586  | 4.94177603  | 3.35968369  |
| H  | 3.27074179  | 6.55772116  | 2.00704612  |
| H  | 1.29141289  | 5.80705444  | 0.75333919  |
| H  | -1.47137036 | 3.67342516  | -1.99400191 |
| H  | -3.12192423 | 5.42689801  | -2.55365459 |
| H  | -3.68326134 | 7.18182005  | -0.88975550 |
| H  | -2.58955930 | 7.16438313  | 1.33797623  |
| H  | -0.93079552 | 5.43107486  | 1.89226191  |

|    |             |             |             |
|----|-------------|-------------|-------------|
| O  | 3.02538751  | -0.45362176 | 1.36112874  |
| O  | -0.74499907 | 2.06315967  | 1.24101291  |
| O  | -2.26538061 | -0.42004791 | -0.04965406 |
| C  | -1.16854400 | 1.45832892  | 4.17189135  |
| O  | -0.29585179 | 0.49504842  | 3.50145557  |
| C  | -2.60649461 | 0.95247633  | 4.11405141  |
| O  | -2.80926252 | 0.42095578  | 2.76607475  |
| C  | -4.20175276 | 0.31042725  | 2.29373866  |
| O  | -4.58702901 | -2.09356193 | 2.76333356  |
| C  | -5.02677726 | -0.73561662 | 3.02379075  |
| O  | -2.58999115 | -4.24505215 | 2.12423941  |
| C  | -3.61987413 | -2.63733014 | 3.71034449  |
| O  | -0.55668632 | -1.84978113 | 2.37489888  |
| C  | -3.36155750 | -4.08415966 | 3.34486673  |
| C  | -1.13640795 | -4.27025339 | 2.22468049  |
| C  | -0.49943570 | -3.07221612 | 1.54582468  |
| C  | 0.62361907  | -1.66122508 | 3.24874322  |
| C  | 0.20654210  | -0.63896246 | 4.27798628  |
| H  | -0.84039876 | 1.62113503  | 5.19955746  |
| H  | -3.30264017 | 1.77469761  | 4.29778356  |
| H  | -4.67070428 | 1.29526443  | 2.38711170  |
| H  | -5.06690504 | -0.54762925 | 4.10320183  |
| H  | -2.68928619 | -2.07033128 | 3.67643876  |
| H  | -4.04375274 | -2.59313210 | 4.72298018  |
| H  | -2.85576535 | -4.58540292 | 4.17891090  |
| H  | -4.31032294 | -4.58406126 | 3.16068998  |
| H  | -0.82160063 | -4.34877761 | 3.27101907  |
| H  | -0.80703110 | -5.17179227 | 1.70319944  |
| H  | 0.54443209  | -3.27052499 | 1.30201685  |
| H  | -1.03386417 | -2.83781232 | 0.63313446  |
| H  | 0.88198809  | -2.60581607 | 3.73046487  |
| H  | 1.45737504  | -1.30578943 | 2.63748868  |
| H  | -0.58317203 | -1.02787282 | 4.92521152  |
| H  | 1.05511643  | -0.31830959 | 4.88408142  |
| Mg | -1.09916164 | 0.09594664  | 1.51377545  |
| H  | -1.05353845 | 2.36567842  | 3.59067656  |
| H  | -2.79318220 | 0.16244164  | 4.84388547  |
| H  | -6.04651054 | -0.67613580 | 2.63979705  |
| H  | -4.09337069 | 0.05013954  | 1.24600710  |

Table S3C. Coordinates (x,y,z) for DFT optimized structure of [Fe<sup>IV</sup>poat(O)---Ca<sup>II</sup>]<sup>+</sup>

|   | X       | Y        | Z        |
|---|---------|----------|----------|
| C | 1.89000 | -0.69900 | -3.88900 |
| C | 3.03000 | -0.74800 | -2.88200 |
| C | 3.82900 | -2.51200 | 0.06100  |
| C | 3.09600 | -3.50800 | -0.60200 |
| C | 3.33300 | -4.86200 | -0.33900 |
| C | 4.30700 | -5.23500 | 0.59000  |
| C | 5.04200 | -4.25000 | 1.26000  |
| C | 4.80400 | -2.90000 | 0.99900  |
| C | 5.10200 | -0.03100 | -0.77200 |
| C | 6.09700 | -0.77900 | -1.42400 |

|    |          |          |          |
|----|----------|----------|----------|
| C  | 7.28800  | -0.17100 | -1.83200 |
| C  | 7.49700  | 1.19000  | -1.59500 |
| C  | 6.51600  | 1.94100  | -0.94200 |
| C  | 5.32700  | 1.33600  | -0.52900 |
| C  | -0.41900 | 0.16400  | -4.17400 |
| C  | -1.18300 | -1.02000 | -3.59400 |
| C  | -2.62600 | -3.17600 | -1.27200 |
| C  | -1.47800 | -3.96000 | -1.47000 |
| C  | -1.55600 | -5.35500 | -1.44300 |
| C  | -2.78400 | -5.98400 | -1.22100 |
| C  | -3.93400 | -5.21400 | -1.02000 |
| C  | -3.85600 | -3.82000 | -1.04200 |
| C  | -4.00100 | -0.73400 | -2.03500 |
| C  | -4.60100 | -1.35500 | -3.14600 |
| C  | -5.75200 | -0.81500 | -3.72700 |
| C  | -6.32100 | 0.34800  | -3.20300 |
| C  | -5.73900 | 0.96900  | -2.09400 |
| C  | -4.58700 | 0.43300  | -1.51300 |
| C  | 1.42400  | 1.71500  | -3.49900 |
| C  | 0.56900  | 2.64000  | -2.63700 |
| C  | 1.03800  | 3.87600  | 0.44500  |
| C  | 1.96500  | 3.32400  | 1.35100  |
| C  | 3.09100  | 4.05200  | 1.73800  |
| C  | 3.31400  | 5.33500  | 1.22600  |
| C  | 2.40900  | 5.88500  | 0.31600  |
| C  | 1.27900  | 5.16000  | -0.07600 |
| C  | -1.69500 | 3.91800  | -0.62500 |
| C  | -2.53900 | 3.53600  | -1.68200 |
| C  | -3.64200 | 4.31900  | -2.03200 |
| C  | -3.92200 | 5.49000  | -1.32500 |
| C  | -3.10300 | 5.87100  | -0.25800 |
| C  | -1.99900 | 5.08900  | 0.09100  |
| C  | -0.70200 | 2.47000  | 4.09300  |
| C  | -2.06100 | 2.03900  | 4.60300  |
| C  | -3.98900 | 0.70100  | 3.80500  |
| C  | -3.84400 | -0.70100 | 4.35800  |
| C  | -2.96400 | -2.86800 | 3.58300  |
| C  | -2.29400 | -3.42800 | 2.34600  |
| C  | 0.12700  | -3.44800 | 2.81400  |
| C  | 1.26300  | -2.45900 | 2.82100  |
| C  | 1.78200  | -0.32100 | 3.93700  |
| C  | 1.04700  | 0.78100  | 4.65900  |
| Ca | -1.09900 | -0.17300 | 1.97400  |
| Fe | 0.54400  | -0.07300 | -1.41400 |
| H  | 2.24700  | -0.45900 | -4.89700 |
| H  | 1.38400  | -1.66100 | -3.92900 |
| H  | 3.76000  | 0.04100  | -3.08400 |
| H  | 3.56400  | -1.69500 | -3.01000 |
| H  | 2.33500  | -3.21500 | -1.31200 |
| H  | 2.76500  | -5.62000 | -0.86200 |
| H  | 4.49700  | -6.28100 | 0.78800  |
| H  | 5.79900  | -4.53500 | 1.97900  |
| H  | 5.37800  | -2.14500 | 1.52100  |
| H  | 5.95300  | -1.83600 | -1.60300 |

|   |          |          |          |
|---|----------|----------|----------|
| H | 8.04900  | -0.75900 | -2.32700 |
| H | 8.42000  | 1.65900  | -1.90900 |
| H | 6.67800  | 2.99300  | -0.74700 |
| H | 4.57800  | 1.91100  | -0.00200 |
| H | -0.99600 | 1.07000  | -4.01600 |
| H | -0.23300 | 0.05000  | -5.24700 |
| H | -2.19900 | -0.99200 | -3.99400 |
| H | -0.74700 | -1.97000 | -3.92500 |
| H | -0.52800 | -3.47000 | -1.63400 |
| H | -0.66600 | -5.94800 | -1.60100 |
| H | -2.84700 | -7.06400 | -1.21100 |
| H | -4.88800 | -5.69700 | -0.85300 |
| H | -4.75200 | -3.23400 | -0.89000 |
| H | -4.19000 | -2.27300 | -3.54600 |
| H | -6.20400 | -1.30600 | -4.57800 |
| H | -7.21500 | 0.76200  | -3.64900 |
| H | -6.18100 | 1.86400  | -1.67800 |
| H | -4.14200 | 0.90500  | -0.64800 |
| H | 2.43300  | 1.68400  | -3.10100 |
| H | 1.46800  | 2.05700  | -4.53800 |
| H | 1.15900  | 3.54100  | -2.43200 |
| H | -0.31400 | 2.97300  | -3.19200 |
| H | 1.81100  | 2.32400  | 1.72900  |
| H | 3.79700  | 3.61600  | 2.43200  |
| H | 4.18600  | 5.89800  | 1.53100  |
| H | 2.57800  | 6.87500  | -0.08800 |
| H | 0.58500  | 5.60400  | -0.77600 |
| H | -2.34200 | 2.61500  | -2.21300 |
| H | -4.27900 | 4.01200  | -2.85100 |
| H | -4.77200 | 6.10100  | -1.59900 |
| H | -3.32100 | 6.77200  | 0.29800  |
| H | -1.37500 | 5.39500  | 0.92000  |
| H | -0.16600 | 3.05200  | 4.84600  |
| H | -2.68100 | 2.91300  | 4.82500  |
| H | -4.54300 | 1.34400  | 4.49300  |
| H | -3.35800 | -0.71000 | 5.33800  |
| H | -2.40600 | -3.09400 | 4.49700  |
| H | -3.97600 | -3.27700 | 3.67700  |
| H | -2.18500 | -4.51300 | 2.41500  |
| H | -2.87200 | -3.18200 | 1.46300  |
| H | -0.14900 | -3.71200 | 3.83900  |
| H | 0.40500  | -4.35400 | 2.26900  |
| H | 2.11100  | -2.86200 | 3.38000  |
| H | 1.58200  | -2.19500 | 1.81600  |
| H | 2.46600  | -0.83100 | 4.62300  |
| H | 2.33000  | 0.04000  | 3.06700  |
| H | 0.54300  | 0.39800  | 5.55100  |
| H | 1.74100  | 1.57500  | 4.94800  |
| H | -0.81100 | 3.04600  | 3.18000  |
| H | -1.97200 | 1.42500  | 5.50500  |
| H | -4.82900 | -1.17200 | 4.44900  |
| H | -4.50400 | 0.67400  | 2.84800  |
| N | 0.88100  | 0.31600  | -3.44100 |
| N | 2.44800  | -0.61100 | -1.51800 |

|   |          |          |          |
|---|----------|----------|----------|
| N | -1.15300 | -0.90600 | -2.11200 |
| N | 0.18700  | 1.92300  | -1.39400 |
| O | 0.33900  | -0.51800 | 0.17400  |
| O | 3.06800  | -0.04800 | 1.06600  |
| O | -0.82700 | 1.94000  | 1.05500  |
| O | -2.47000 | -0.84100 | 0.21500  |
| O | 0.07100  | 1.29500  | 3.70700  |
| O | -2.67200 | 1.26500  | 3.52400  |
| O | -3.02900 | -1.42300 | 3.39300  |
| O | -0.99500 | -2.79600 | 2.14500  |
| O | 0.74700  | -1.26000 | 3.48800  |
| P | 3.50000  | -0.72900 | -0.21500 |
| P | -2.47900 | -1.35100 | -1.22500 |
| P | -0.34000 | 2.80500  | -0.10100 |

Table S3D. Coordinates (x,y,z) for DFT optimized structure of  $[\text{Fe}^{\text{IV}}\text{poat}(\text{O})\text{---Sr}^{\text{II}}]^+$

|   | X        | Y        | Z        |
|---|----------|----------|----------|
| C | 1.89400  | -0.68300 | -4.01000 |
| C | 3.00700  | -0.85300 | -2.98500 |
| C | 3.57600  | -2.73300 | -0.01500 |
| C | 2.76800  | -3.66200 | -0.68800 |
| C | 2.87700  | -5.03000 | -0.41700 |
| C | 3.79700  | -5.48400 | 0.53100  |
| C | 4.60600  | -4.56700 | 1.21100  |
| C | 4.49600  | -3.20200 | 0.94100  |
| C | 5.08300  | -0.37600 | -0.81900 |
| C | 6.03000  | -1.21000 | -1.43700 |
| C | 7.27800  | -0.70700 | -1.81500 |
| C | 7.59300  | 0.63400  | -1.58300 |
| C | 6.65900  | 1.47100  | -0.96500 |
| C | 5.41400  | 0.97100  | -0.58100 |
| C | -0.33900 | 0.36100  | -4.30300 |
| C | -1.20100 | -0.78000 | -3.77700 |
| C | -2.68000 | -3.00200 | -1.49200 |
| C | -1.54800 | -3.79500 | -1.73900 |
| C | -1.64100 | -5.19000 | -1.73200 |
| C | -2.86700 | -5.81000 | -1.48000 |
| C | -4.00200 | -5.03100 | -1.23100 |
| C | -3.90900 | -3.63700 | -1.23500 |
| C | -4.02500 | -0.54800 | -2.27700 |
| C | -4.61100 | -1.17200 | -3.39400 |
| C | -5.74200 | -0.62200 | -4.00200 |
| C | -6.30500 | 0.55500  | -3.50100 |
| C | -5.73700 | 1.17800  | -2.38600 |
| C | -4.60500 | 0.63100  | -1.77700 |
| C | 1.60100  | 1.74600  | -3.54800 |
| C | 0.80000  | 2.70300  | -2.67100 |
| C | 1.36800  | 3.90700  | 0.37800  |
| C | 2.26000  | 3.32100  | 1.29700  |
| C | 3.42600  | 3.99300  | 1.67100  |
| C | 3.72100  | 5.25000  | 1.13300  |
| C | 2.84800  | 5.83400  | 0.21200  |



|    |          |          |          |
|----|----------|----------|----------|
| C  | 1.67900  | 5.16500  | -0.16600 |
| C  | -1.38200 | 4.08000  | -0.65500 |
| C  | -2.26800 | 3.71100  | -1.68100 |
| C  | -3.34500 | 4.53400  | -2.02200 |
| C  | -3.55400 | 5.73400  | -1.33800 |
| C  | -2.69000 | 6.10200  | -0.30200 |
| C  | -1.61400 | 5.28000  | 0.04000  |
| C  | -0.19100 | 2.37300  | 4.24900  |
| C  | -1.53400 | 2.07300  | 4.88600  |
| C  | -3.71100 | 1.06200  | 4.22500  |
| C  | -3.77000 | -0.40200 | 4.60800  |
| C  | -3.36100 | -2.60400 | 3.59100  |
| C  | -2.75200 | -3.19900 | 2.33700  |
| C  | -0.36200 | -3.59500 | 2.87500  |
| C  | 0.93000  | -2.81500 | 2.85300  |
| C  | 1.84800  | -0.75000 | 3.86200  |
| C  | 1.34700  | 0.44300  | 4.63800  |
| Fe | 0.55400  | -0.03500 | -1.54100 |
| H  | 2.28900  | -0.44100 | -5.00300 |
| H  | 1.31700  | -1.60200 | -4.09100 |
| H  | 3.80000  | -0.11800 | -3.14900 |
| H  | 3.46900  | -1.83500 | -3.13400 |
| H  | 2.05100  | -3.30300 | -1.41400 |
| H  | 2.25200  | -5.73700 | -0.94700 |
| H  | 3.88900  | -6.54300 | 0.73500  |
| H  | 5.32400  | -4.91600 | 1.94200  |
| H  | 5.12700  | -2.49900 | 1.46900  |
| H  | 5.80300  | -2.25300 | -1.61200 |
| H  | 8.00100  | -1.36100 | -2.28400 |
| H  | 8.56000  | 1.02200  | -1.87500 |
| H  | 6.90300  | 2.50800  | -0.77500 |
| H  | 4.69900  | 1.61200  | -0.08300 |
| H  | -0.84800 | 1.30400  | -4.12400 |
| H  | -0.14400 | 0.26900  | -5.37700 |
| H  | -2.20700 | -0.65700 | -4.18500 |
| H  | -0.83500 | -1.74700 | -4.14300 |
| H  | -0.59900 | -3.31300 | -1.92900 |
| H  | -0.76200 | -5.79000 | -1.92900 |
| H  | -2.94100 | -6.88900 | -1.48500 |
| H  | -4.95500 | -5.50600 | -1.04200 |
| H  | -4.79500 | -3.04400 | -1.05000 |
| H  | -4.20200 | -2.09700 | -3.77800 |
| H  | -6.18500 | -1.11400 | -4.85800 |
| H  | -7.18400 | 0.97700  | -3.96900 |
| H  | -6.17600 | 2.08200  | -1.98600 |
| H  | -4.17400 | 1.10300  | -0.90600 |
| H  | 2.59800  | 1.63000  | -3.13300 |
| H  | 1.69000  | 2.11900  | -4.57400 |
| H  | 1.44200  | 3.56500  | -2.45200 |
| H  | -0.06200 | 3.09700  | -3.22000 |
| H  | 2.04800  | 2.34000  | 1.69800  |
| H  | 4.10500  | 3.53200  | 2.37600  |
| H  | 4.62400  | 5.76900  | 1.42800  |
| H  | 3.07200  | 6.80400  | -0.20900 |

|    |          |          |          |
|----|----------|----------|----------|
| H  | 1.00900  | 5.63500  | -0.87300 |
| H  | -2.12400 | 2.77100  | -2.19500 |
| H  | -4.01600 | 4.23700  | -2.81700 |
| H  | -4.38300 | 6.37500  | -1.60600 |
| H  | -2.85300 | 7.02600  | 0.23700  |
| H  | -0.95700 | 5.57500  | 0.84700  |
| H  | 0.47100  | 2.87700  | 4.95800  |
| H  | -2.01200 | 3.00200  | 5.21100  |
| H  | -4.07200 | 1.69300  | 5.04100  |
| H  | -3.16700 | -0.61300 | 5.49700  |
| H  | -2.84300 | -2.93600 | 4.49600  |
| H  | -4.41600 | -2.88800 | 3.66500  |
| H  | -2.82500 | -4.28900 | 2.35000  |
| H  | -3.25400 | -2.81600 | 1.45400  |
| H  | -0.67100 | -3.78000 | 3.90700  |
| H  | -0.24400 | -4.54800 | 2.35400  |
| H  | 1.70600  | -3.36400 | 3.39500  |
| H  | 1.27000  | -2.62800 | 1.83400  |
| H  | 2.51500  | -1.35000 | 4.48800  |
| H  | 2.35800  | -0.45500 | 2.94200  |
| H  | 0.83500  | 0.12800  | 5.55200  |
| H  | 2.18300  | 1.09900  | 4.89900  |
| H  | -0.32600 | 2.99100  | 3.36600  |
| H  | -1.43100 | 1.40500  | 5.74700  |
| H  | -4.80700 | -0.69400 | 4.80700  |
| H  | -4.32200 | 1.24400  | 3.34300  |
| N  | 0.95600  | 0.39100  | -3.54700 |
| N  | 2.41000  | -0.71500 | -1.62900 |
| N  | -1.18300 | -0.72500 | -2.29200 |
| N  | 0.37500  | 1.99000  | -1.43700 |
| O  | 0.29200  | -0.55200 | 0.01400  |
| O  | 3.01500  | -0.21200 | 0.97200  |
| O  | -0.58500 | 2.09100  | 1.04500  |
| O  | -2.55500 | -0.68700 | 0.01400  |
| O  | 0.42400  | 1.14700  | 3.75400  |
| O  | -2.35000 | 1.43800  | 3.85000  |
| O  | -3.24800 | -1.15200 | 3.47200  |
| O  | -1.36200 | -2.78100 | 2.18800  |
| O  | 0.65500  | -1.54300 | 3.52100  |
| P  | 3.41300  | -0.93000 | -0.30100 |
| P  | -2.52700 | -1.17900 | -1.43100 |
| P  | -0.07500 | 2.90800  | -0.13800 |
| Sr | -1.11500 | -0.11200 | 1.97000  |

Table S3E. Coordinates (x,y,z) for DFT optimized structure of [Fe<sup>IV</sup>poat(O)---Ba<sup>II</sup>]<sup>+</sup>

|    | X        | Y        | Z        |
|----|----------|----------|----------|
| Ba | -1.14700 | -0.14300 | 1.92900  |
| C  | 2.02200  | -0.45600 | -4.12500 |
| C  | 3.09600  | -0.70800 | -3.07100 |
| C  | 3.27800  | -2.72900 | -0.04000 |
| C  | 2.24500  | -3.50900 | -0.58100 |
| C  | 2.14500  | -4.87000 | -0.27600 |

|    |          |          |          |
|----|----------|----------|----------|
| C  | 3.08300  | -5.47000 | 0.56800  |
| C  | 4.11700  | -4.70300 | 1.11500  |
| C  | 4.21200  | -3.34200 | 0.81700  |
| C  | 5.12600  | -0.62500 | -0.82500 |
| C  | 5.92800  | -1.55800 | -1.50400 |
| C  | 7.24900  | -1.24800 | -1.83800 |
| C  | 7.78400  | -0.00200 | -1.50000 |
| C  | 6.99600  | 0.93200  | -0.82100 |
| C  | 5.67700  | 0.62200  | -0.48100 |
| C  | -0.18000 | 0.65600  | -4.43200 |
| C  | -1.07200 | -0.50600 | -4.01000 |
| C  | -2.50500 | -2.96500 | -1.90300 |
| C  | -1.41800 | -3.69300 | -2.40900 |
| C  | -1.47900 | -5.08600 | -2.51200 |
| C  | -2.62800 | -5.76800 | -2.10500 |
| C  | -3.71700 | -5.05300 | -1.59300 |
| C  | -3.65700 | -3.66200 | -1.49300 |
| C  | -3.91200 | -0.52000 | -2.59300 |
| C  | -4.49200 | -1.16000 | -3.70300 |
| C  | -5.62100 | -0.61800 | -4.32400 |
| C  | -6.18400 | 0.56700  | -3.84400 |
| C  | -5.61900 | 1.20800  | -2.73700 |
| C  | -4.49100 | 0.66900  | -2.11400 |
| C  | 1.77100  | 1.95600  | -3.56000 |
| C  | 0.95500  | 2.89200  | -2.67400 |
| C  | 1.46000  | 3.98600  | 0.36900  |
| C  | 2.42200  | 3.29600  | 1.13400  |
| C  | 3.59100  | 3.94300  | 1.53900  |
| C  | 3.82200  | 5.27700  | 1.18600  |
| C  | 2.88300  | 5.96200  | 0.41300  |
| C  | 1.71000  | 5.31900  | 0.00200  |
| C  | -1.30000 | 4.20700  | -0.66800 |
| C  | -2.13500 | 3.90300  | -1.75700 |
| C  | -3.21400 | 4.72800  | -2.08200 |
| C  | -3.47900 | 5.86700  | -1.31800 |
| C  | -2.66900 | 6.17100  | -0.22000 |
| C  | -1.59100 | 5.34500  | 0.10700  |
| C  | -0.17100 | 2.31000  | 4.40300  |
| C  | -1.47800 | 1.95400  | 5.08800  |
| C  | -3.68200 | 0.94900  | 4.48400  |
| C  | -3.72500 | -0.52800 | 4.82200  |
| C  | -3.38200 | -2.72000 | 3.77200  |
| C  | -2.74600 | -3.34100 | 2.54100  |
| C  | -0.37000 | -3.67800 | 3.18800  |
| C  | 0.94000  | -2.93000 | 3.10200  |
| C  | 1.90600  | -0.77600 | 3.86900  |
| C  | 1.45800  | 0.43000  | 4.66100  |
| Fe | 0.62100  | 0.11100  | -1.68000 |
| H  | 2.45900  | -0.17700 | -5.09000 |
| H  | 1.42600  | -1.35400 | -4.27100 |
| H  | 3.92100  | 0.00100  | -3.18200 |
| H  | 3.52100  | -1.70200 | -3.24700 |
| H  | 1.51400  | -3.03800 | -1.22200 |
| H  | 1.33900  | -5.45700 | -0.69800 |

|   |          |          |          |
|---|----------|----------|----------|
| H | 3.01500  | -6.52700 | 0.79200  |
| H | 4.85000  | -5.16400 | 1.76500  |
| H | 5.01600  | -2.75700 | 1.24400  |
| H | 5.53200  | -2.53100 | -1.76100 |
| H | 7.85800  | -1.97700 | -2.35500 |
| H | 8.80700  | 0.23600  | -1.75900 |
| H | 7.40900  | 1.89400  | -0.55000 |
| H | 5.07200  | 1.33400  | 0.06300  |
| H | -0.68100 | 1.59200  | -4.20200 |
| H | 0.03900  | 0.63500  | -5.50500 |
| H | -2.07100 | -0.33000 | -4.41500 |
| H | -0.72100 | -1.44400 | -4.45800 |
| H | -0.52800 | -3.16400 | -2.71800 |
| H | -0.63800 | -5.63500 | -2.91400 |
| H | -2.68000 | -6.84500 | -2.19100 |
| H | -4.61200 | -5.57800 | -1.28400 |
| H | -4.50900 | -3.11600 | -1.11000 |
| H | -4.07700 | -2.08800 | -4.07300 |
| H | -6.06000 | -1.12200 | -5.17400 |
| H | -7.06000 | 0.98300  | -4.32300 |
| H | -6.05900 | 2.11900  | -2.35400 |
| H | -4.06500 | 1.15400  | -1.24800 |
| H | 2.74500  | 1.79500  | -3.10800 |
| H | 1.91300  | 2.37100  | -4.56400 |
| H | 1.60500  | 3.72600  | -2.38400 |
| H | 0.12900  | 3.33500  | -3.24000 |
| H | 2.27200  | 2.25400  | 1.38300  |
| H | 4.32200  | 3.40200  | 2.12500  |
| H | 4.72800  | 5.77500  | 1.50500  |
| H | 3.06000  | 6.99000  | 0.12700  |
| H | 0.99500  | 5.86400  | -0.59800 |
| H | -1.94900 | 3.00600  | -2.33200 |
| H | -3.84500 | 4.48100  | -2.92500 |
| H | -4.31100 | 6.51100  | -1.57200 |
| H | -2.87700 | 7.04600  | 0.38100  |
| H | -0.98000 | 5.58600  | 0.96600  |
| H | 0.50200  | 2.81600  | 5.10200  |
| H | -1.94700 | 2.85800  | 5.48900  |
| H | -4.01700 | 1.54400  | 5.33900  |
| H | -3.05900 | -0.76900 | 5.65700  |
| H | -2.86700 | -3.02600 | 4.68800  |
| H | -4.43000 | -3.02900 | 3.84300  |
| H | -2.82800 | -4.43100 | 2.58200  |
| H | -3.23700 | -2.98700 | 1.63800  |
| H | -0.69600 | -3.73900 | 4.22900  |
| H | -0.25600 | -4.68700 | 2.78400  |
| H | 1.69800  | -3.44900 | 3.69800  |
| H | 1.29000  | -2.85900 | 2.07200  |
| H | 2.63500  | -1.34900 | 4.45000  |
| H | 2.34100  | -0.49200 | 2.90600  |
| H | 1.01800  | 0.12200  | 5.61500  |
| H | 2.30900  | 1.09000  | 4.85000  |
| H | -0.35800 | 2.95500  | 3.54900  |
| H | -1.32200 | 1.24200  | 5.90400  |

|   |          |          |          |
|---|----------|----------|----------|
| H | -4.74700 | -0.81100 | 5.09500  |
| H | -4.33500 | 1.15800  | 3.63900  |
| N | 1.09500  | 0.61900  | -3.64400 |
| N | 2.46200  | -0.59900 | -1.73100 |
| N | -1.07300 | -0.58500 | -2.52400 |
| N | 0.45700  | 2.13300  | -1.49300 |
| O | 0.32300  | -0.47300 | -0.15800 |
| O | 3.03700  | -0.13100 | 0.88400  |
| O | -0.52700 | 2.18700  | 0.98900  |
| O | -2.52400 | -0.75300 | -0.25700 |
| O | 0.46700  | 1.12300  | 3.84600  |
| O | -2.34600 | 1.36600  | 4.06500  |
| O | -3.30400 | -1.26700 | 3.63500  |
| O | -1.35100 | -2.94100 | 2.39300  |
| O | 0.70300  | -1.59600 | 3.64900  |
| P | 3.37600  | -0.92700 | -0.36200 |
| P | -2.42100 | -1.14500 | -1.73100 |
| P | 0.00400  | 3.02200  | -0.17300 |

## References

- (1) Fano, U. *Effects of Configuration Interaction on Intensities and Phase Shifts*, *Phys. Rev.* **1961**, *124*, 1866-1878.
